# Supplementary material for: Improvement of morphological structure and electrochemical charge storage performance of a new poly(terthiophene)-based conducting film through side-chain engineering
Source: Royal Society of Chemistry journal article supplement (doi:10.1039/d3nj03557c), 2023-01-01
Supplement: d3nj03557c1.pdf [file d3nj03557c1.pdf]

ARTICLE

NEW JOURNAL OF CHEMISTRY

## SUPPORTING INFORMATION

**Improvement of morphological structure and electrochemical charge storage performance of a new poly(terthiophene)-based conducting film through side-chain engineering**

Deniz Yiğit<sup>\*a</sup>

<sup>a</sup> *Department of Basic Pharmaceutical Sciences, Faculty of Pharmacy, Lokman Hekim University, Söğütözü, 06510, Ankara, Turkey.*

## CONTENTS

- **Fig. S1** Schematic representation for the fabrication procedure of symmetrical type solid-state supercapacitor cell
- **Fig. S2 (A)**  $^1\text{H}$  NMR spectrum of 2-((2-(4-(((2,5-Dibromothiophen-3-yl)methylene)amino)phenoxy)ethyl)thio)ethanol (7) and **(B)**  $^1\text{H}$  NMR,  $^{13}\text{C}$  NMR and mass spectra of 2-((2-(4-([2,2':5',2''-Terthiophen]-3'-yl)methylene)amino) phenoxy)ethyl)thio)ethanol (KAAN)
- **Fig. S3** Single scan cyclic voltammograms in the cathodic direction of (A) PKAAN- and (B) PTTh-based conducting polymer films
- **Fig. S4** The plots of Log (current density) versus Log (Scan rate) for (A) PKAAN- and (B) PTTh-based redox active electrode materials

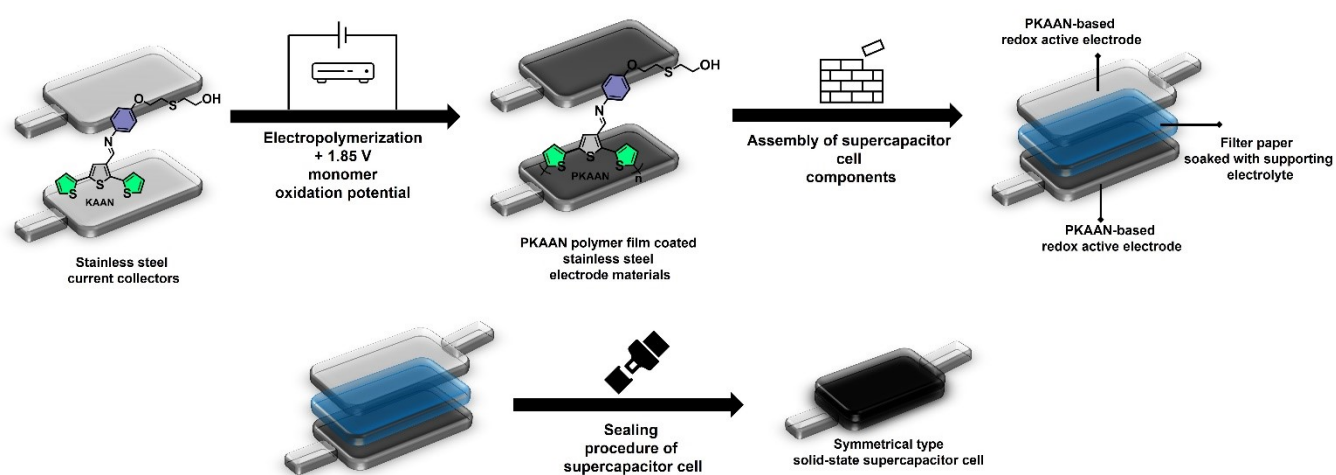

**Fig. S1** Schematic representation for the fabrication procedure of symmetrical type solid-state supercapacitor cell

**(A)**

DY-1350

Sample Name:  
DY-1350  
Data Collected on:  
mercury400-mercury400  
Archive directory:  
/home/vmr1/vmrays/data  
Sample directory:  
DY-1350\_20131101\_01  
FidFile: PROTON\_01

Pulse Sequence: PROTON (s2pul)  
Solvent: cdcl3  
Data collected on: Nov 1 2013

Operator: vmr1

Relax. delay 1.000 sec  
Pulse 45.0 degrees  
Acq. time 2.561 sec  
Width 6398.0 Hz  
0 repetitions  
OBSERVE H1, 400.1740753 MHz  
DATA PROCESSING  
FT size 32768  
Total time 0 min 31 sec

 Agilent Technologies
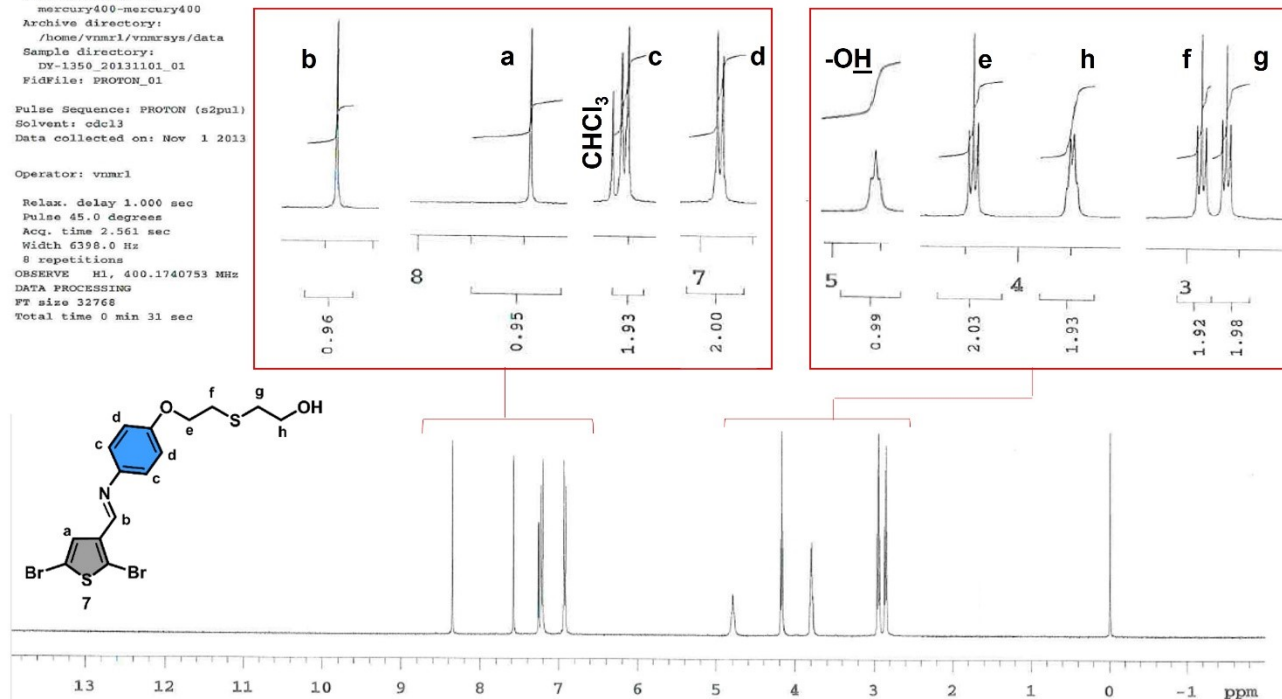**(B)**

DY-1355

Sample Name:  
DY-1355  
Data Collected on:  
mercury400-mercury400  
Archive directory:  
/home/vmr1/vmrays/data  
Sample directory:  
DY-1355\_20130930\_01  
FidFile: PROTON\_01

Pulse Sequence: PROTON (s2pul)  
Solvent: cdcl3  
Data collected on: Sep 30 2013  
Relax. delay 1.000 sec  
Pulse 45.0 degrees  
Acq. time 2.561 sec  
Width 6398.0 Hz  
8 repetitions  
OBSERVE H1, 400.1740753 MHz  
DATA PROCESSING  
FT size 32768  
Total time 0 min 31 sec

 Agilent Technologies
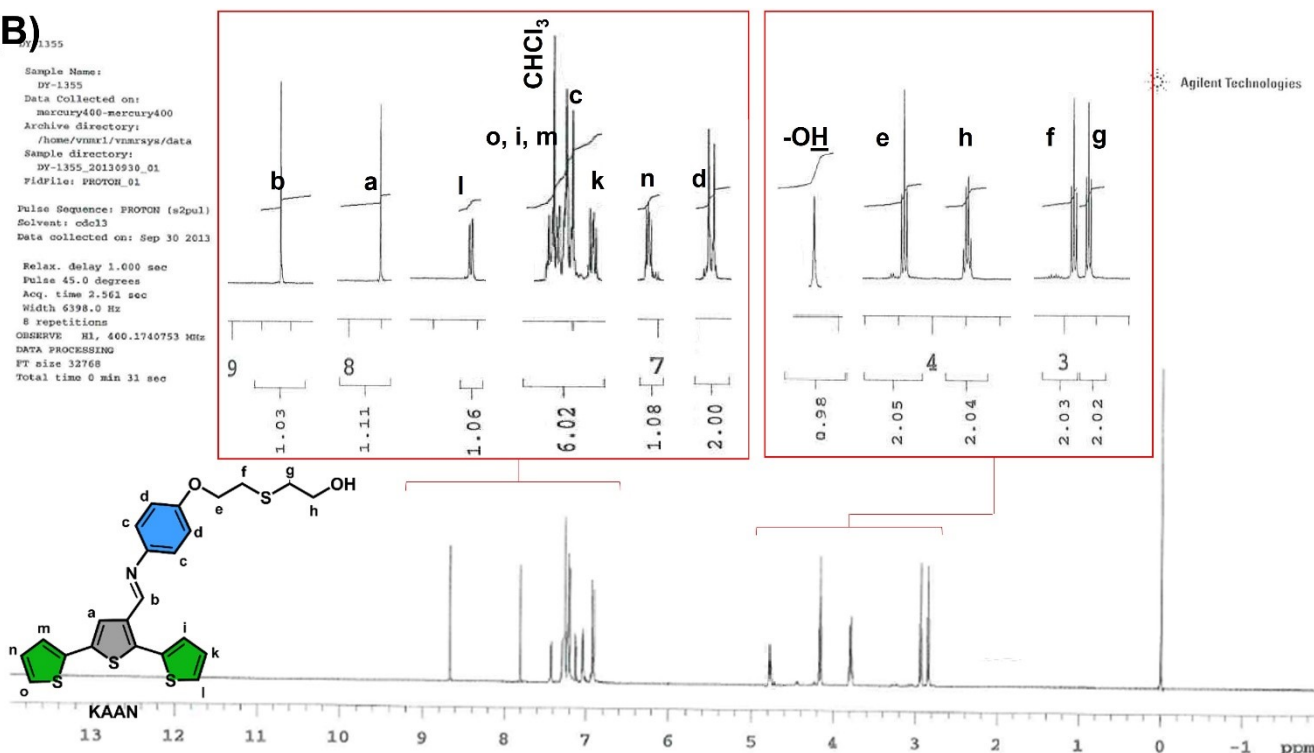

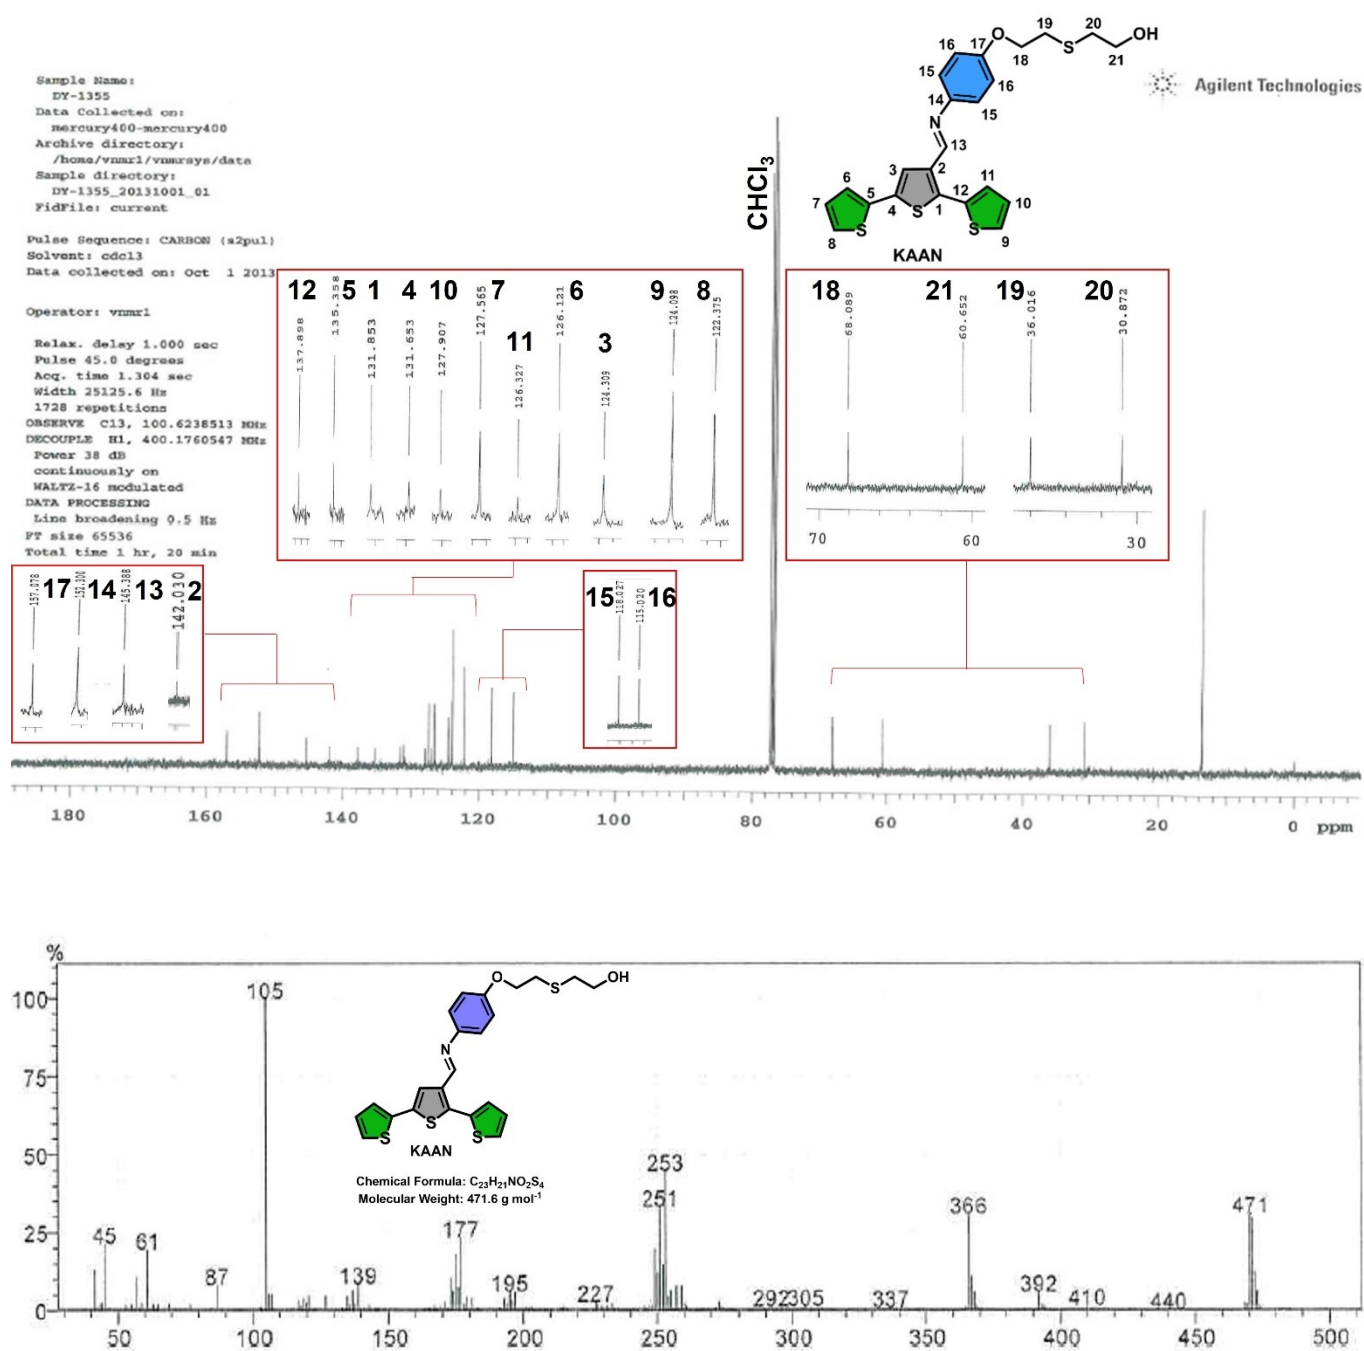

**Fig. S2 (A)** <sup>1</sup>H NMR spectrum of 2-((2-(4-(((2,5-Dibromothiophen-3-yl)methylene)amino)phenoxy)ethyl)thio)ethanol (7) and **(B)** <sup>1</sup>H NMR, <sup>13</sup>C NMR and mass spectra of 2-((2-(4-(((2,2':5',2''-Terthiophen]-3'-ylmethylene)amino) phenoxy)ethyl)thio)ethanol (KAAN)

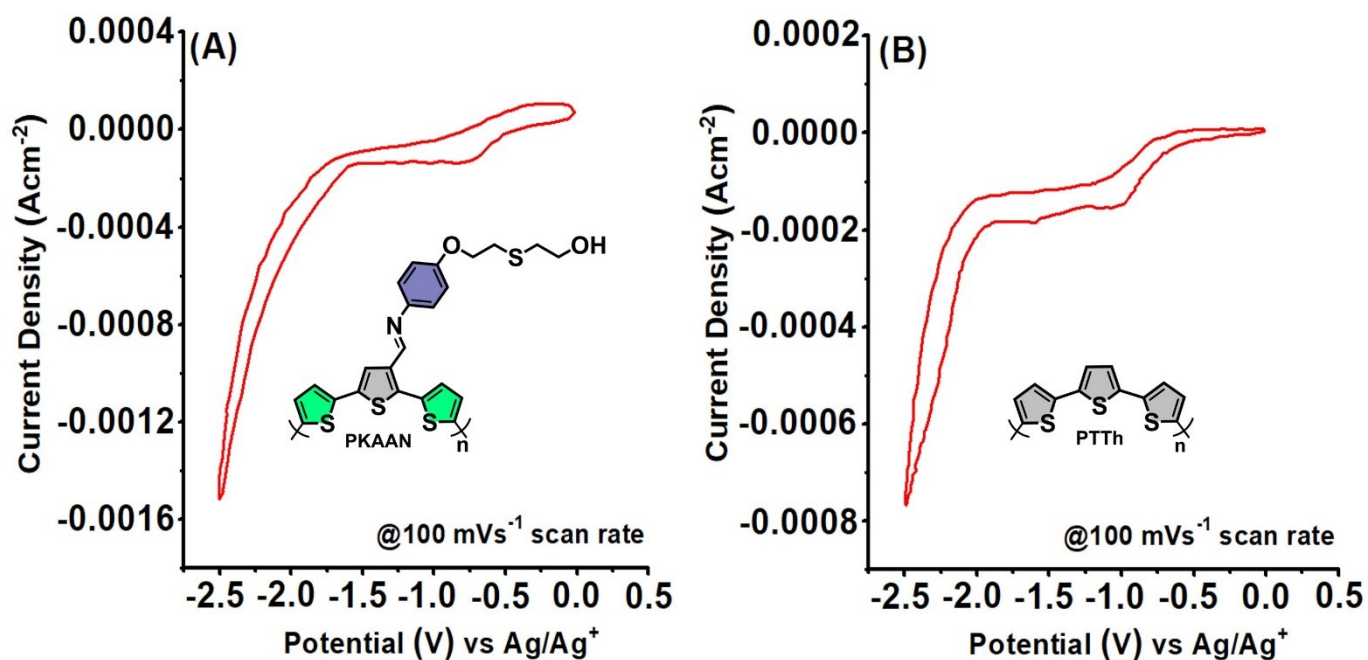

**Fig. S3** Single scan cyclic voltammograms in the cathodic direction of (A) PKAAN- and (B) PTTh-based conducting polymer films

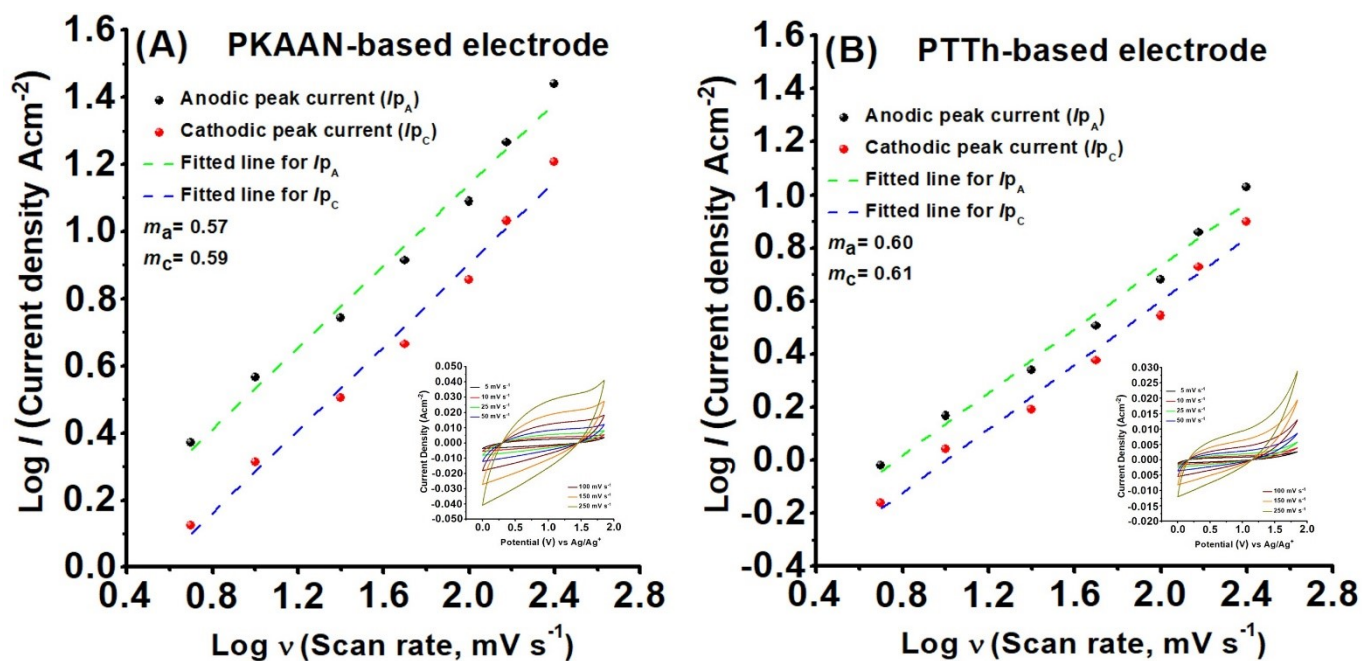

**Fig. S4** The plots of Log (current density) versus Log (Scan rate) for (A) PKAAN- and (B) PTTh-based redox active electrode materials
